# Supplementary material
Source: publisher site journal article supplement (https://www.dovepress.com/article/508013)
Supplement: Supplementary file 1 [file get_supplementary_file.php]

Appendix A: Team Responsibilities

| Position | Responsibilities | Task Goals |
| --- | --- | --- |
| Radiation Quality Expert | Ensures compliance with radiation safety standards. | Conducts risk assessments and monitors trends. |
| Nuclear Medicine Technicians | Operates diagnostic and therapeutic equipment. | Minimizes patient and staff exposure. |
| Diagnostic Physicians | Interprets imaging results and ensures protocol adherence. | Adheres to dose control protocols. |
| Engineers | Maintains equipment and shielding structures. | Conducts regular maintenance and upgrades. |
| IT Specialist | Manages data collection and analysis platforms. | Ensures data accuracy and accessibility. |

Appendix B: Trigger Levels for Compliance

Occupational dose > 20 mSv/year (staff).

Diagnostic reference level exceeded (patients).

Non-compliance with GBZ120-2020 shielding standards.

GBZ120-2020: This standard specifies the radiation protection requirements for personnel and workplaces involved in nuclear medicine diagnosis, treatment, research, and radiopharmaceutical preparation in medical institutions.

This standard applies to the protection of radioactive material use in nuclear medicine diagnosis, treatment, research, and radiopharmaceutical preparation conducted by medical institutions.

Relevant activities in non-medical institutions may refer to this standard for implementation.
